# Supplementary material
Source: ML conference proceedings conference paper supplement (https://proceedings.neurips.cc/paper_files/paper/2019/hash/aba22f748b1a6dff75bda4fd1ee9fe07-Abstract.html)

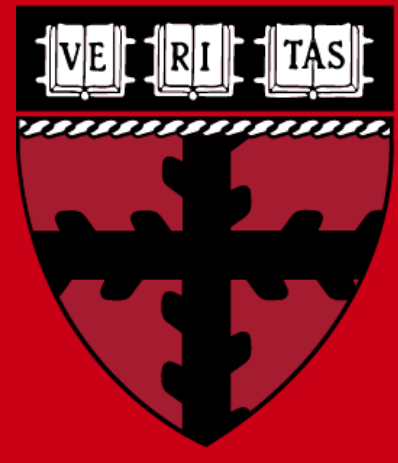

# (Nearly) Efficient Algorithms for the Graph Matching Problem on Correlated Random Graphs

Boaz Barak, Chi-Ning Chou, Zhixian Lei, Tselil Schramm, Yueqi Sheng  
Harvard University, MA, USA

## Motivation

- De-anonymization (e.g., matching social networks)

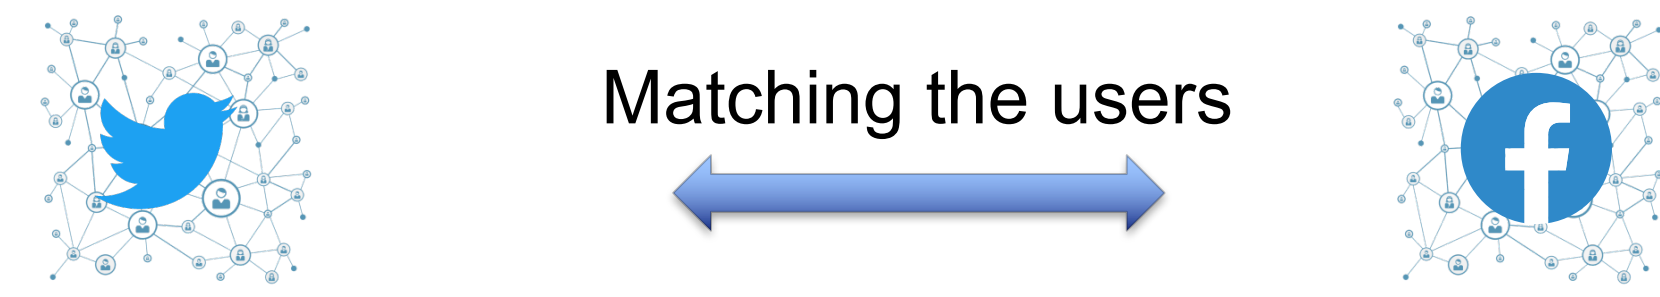

- Malware detection (e.g., finding suspicious patterns in a code)

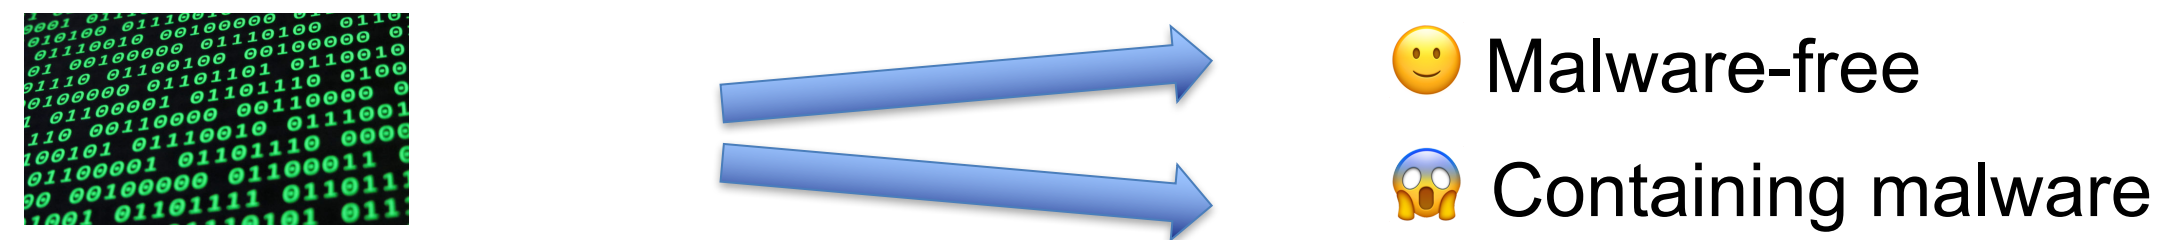

## Problem Formulation

- The distance between two graphs:  $\min_{\pi \in \mathcal{S}_n} \|G_0 - \pi(G_1)\|_0$ .

- Input model: **Correlated Erdős-Rényi Graphs**.

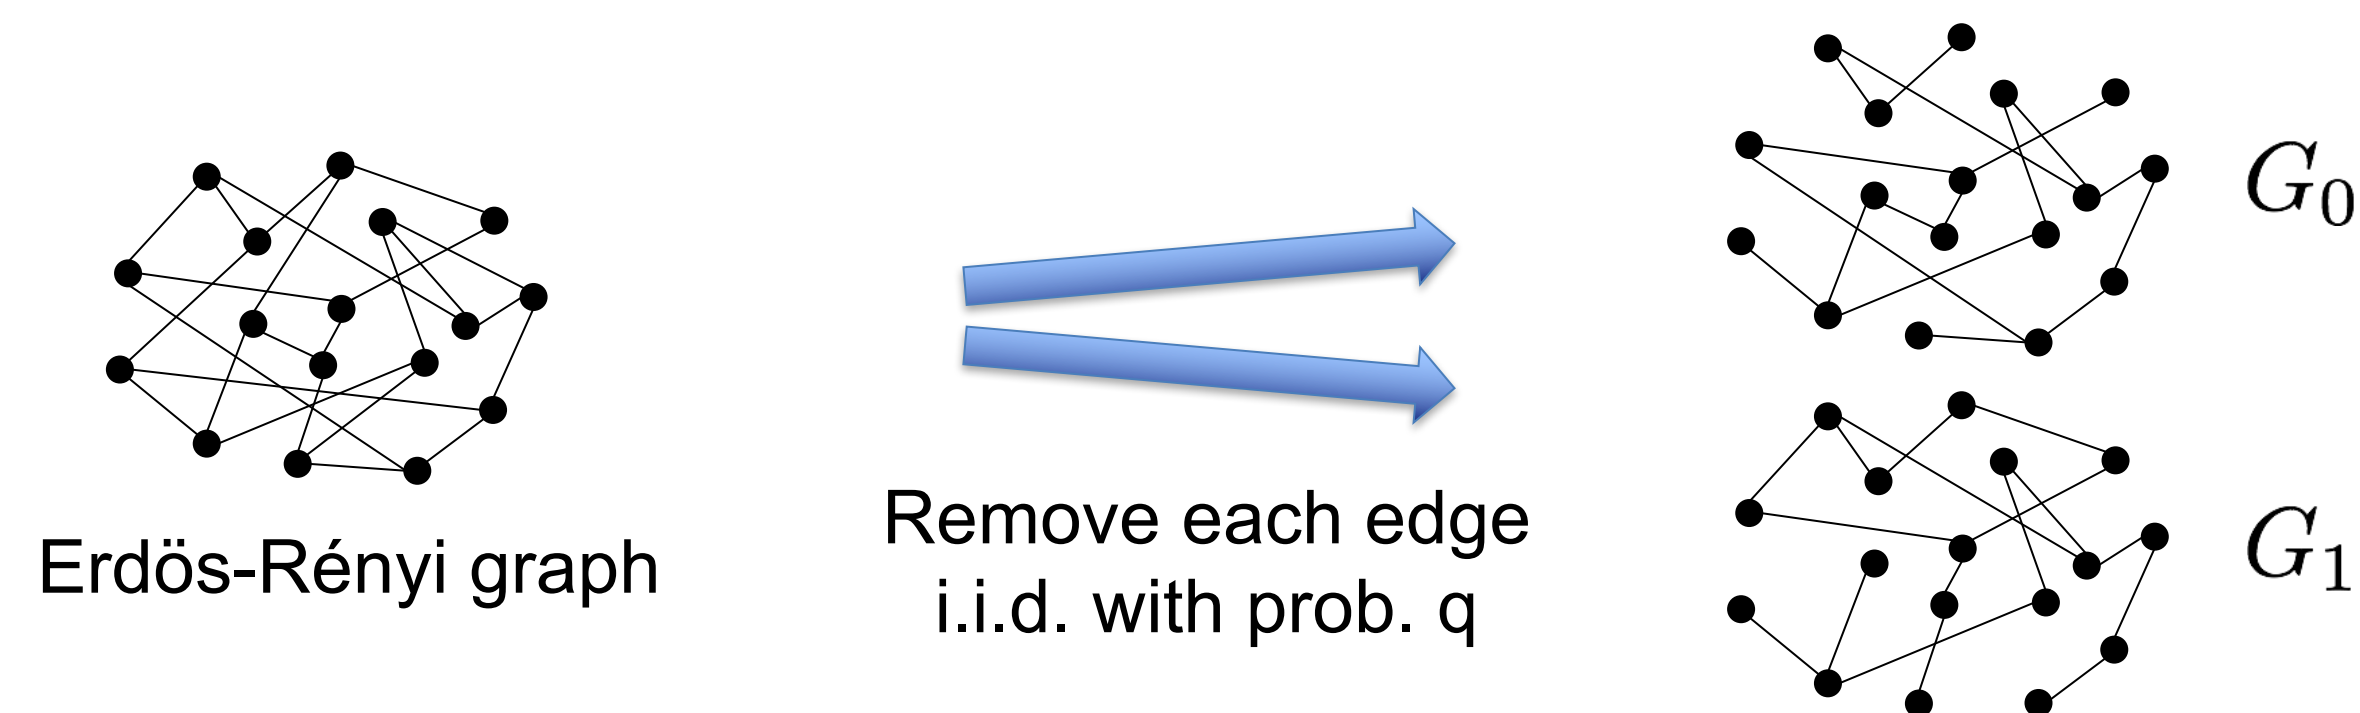

- Two computational problems:

- ◆ **Graph similarity: hypothesis testing.** Given  $(G_0, G_1)$ , distinguish (i) correlated Erdős-Rényi and (ii) independent Erdős-Rényi.
- ◆ **Graph matching: recovery.** Given  $(G_0, G_1)$  sampled from correlated Erdős-Rényi, find the  $\pi^*$  that minimizes the distance.

## Prior Work

- Only exponential time algorithms were known, e.g., *percolation*.

## Our Results

- **Graph similarity:** We give the *first polynomial time* algorithm.
- **Graph matching:** We give the *first quasi-polynomial time* algorithm.

| Paper                   | Algorithm               | Runtime               |
|-------------------------|-------------------------|-----------------------|
| Cullina & Kivayash      | Info-theoretic          | $\exp(O(n))$          |
| Yartseva & Grossglauser | percolation             | $\exp((1 - \delta)n)$ |
| <b>This work</b>        | Subgraph matching       | $n^{O(\log n)}$ *     |
| Mossel & Xu             | Seeded local statistics | $n^{O(\log n)}$ *     |

\* The runtime does not work for all regimes. Ask me for more details!

## Our “Black Swan” Approach

- **Intuition:** Use a family of small graphs (a *flock of black swans*) as the features to compare  $(G_0, G_1)$ .

| A Swan                                        | A Black Swan                                   |
|-----------------------------------------------|------------------------------------------------|
|                                               |                                                |
| The variance of #appearance is <b>large</b> . | ✓ #appearance <b>concentrates</b> near exp.    |
| <b>Too many</b> automorphisms.                | ✓ <b>Unique</b> automorphism.                  |
| <b>Large</b> overlap with other swans.        | ✓ <b>Small</b> overlap with other black swans. |

- **Difficulties:** Construct a large family of black swans with the desiring properties.

## Algorithms

- **Graph similarity:** Use the *correlation of the black swan counts* to perform hypothesis testing.

- ◆ Let  $\mathcal{H}$  be a family of black swans and  $X_H(G)$  be the # of  $H$ 's in  $G$ .
- ◆ Define the correlation polynomial:

$$P_{\mathcal{H}}(G_0, G_1) = \frac{1}{|\mathcal{H}|} \sum_{H \in \mathcal{H}} (X_H(G_0) - \mathbb{E}_G X_H(G))(X_H(G_1) - \mathbb{E}_G X_H(G)).$$

- ◆ **(Correlated Erdős-Rényi):**  $|P_{\mathcal{H}}(G_0, G_1)|$  is large.
- ◆ **(Independent Correlated Erdős-Rényi):**  $|P_{\mathcal{H}}(G_0, G_1)|$  is small.

- **Graph matching:** For each vertex  $v$ , the black swan family gives a *signature vector* according to the position of  $v$  in each swan.

- ◆ **(Partial assignment):** The uniqueness of each swan guarantees the signature vector from  $G_0$  and  $G_1$  of the same vertex being close. This holds w.h.p. for many vertices and give a partial assignment.
- ◆ **(Boosting):** Use the partial assignment as the seeds and generate a full permutation that matches  $G_0$  and  $G_1$ .

## Future Directions

- **For theorists:** (i) Improve the runtime, (ii) construct black swans for a larger range of parameters, and (iii) computational limitation.
- **For experimentalists:** Can our black swan approach guide practical algorithms for graph matching?

◆ Conference version:

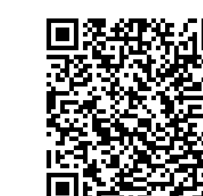

◆ arXiv version:

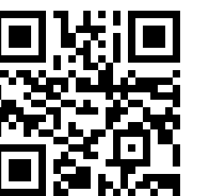

Supplement: Supplementary file [file aba22f748b1a6dff75bda4fd1ee9fe07-Supplemental.zip]
